# Supplementary material for: Study-based registers of randomized controlled trials: Starting a systematic review with data extraction or meta-analysis
Source: PubMed Central journal article supplement — Bioimpacts. 2017 Sep 17;7(4):209–17. doi: 10.15171/bi.2017.25 (PMC5801532; doi:10.15171/bi.2017.25), 2017-09-17
Supplement: bi-7-209-s001.pdf [file bi-7-209-s001.pdf]

File Name: Structure of a Randomized Controlled Trial Study in XML Format

File Description: Following data could be copied and saved with .xml extension and could be opened/edited using any XML Editor. This structure tries to present a machine-readable format for a study record.

Citation: Please cite the main paper

```
<?xml version="1.0"?>
<Studies>
  <Study>
    <General>
      <ID>
        <Trial_Registry_Number>
          Null
        </Trial_Registry_Number>
        <Unique_ID_in_DatabaseDatabase>
          0000001
        </Unique_ID_in_Database>
      </ID>
      <Name>
        Leff 2013
      </Name>
      <Country>
        United Kingdom
      </Country>
      <Status>
        Finished
      </Status>
      <Design>
        Randomized Controlled Crossover Trial
      </Design>
    </General>
    <PICO>
      <Participants>
        <Inclusion_Criteria>
          <Problem>
            <Name>
              Schizophrenia
            </Name>
            <Diagnosis>
              <Tool>
                <Name>
                  Null
                </Name>
                <Value>
                  Null
                </Value>
                <User>
                  Null
                </User>
              </Tool>
            <History>
              Null
            </History>
          </Problem>
        </Inclusion_Criteria>
      </Participants>
    </PICO>
  </Study>
</Studies>
```

antipsychotic medication irrespective of diagnosis"

```
</Diagnosis>
</Problem>
<Problem>
  <Name>
    Treatment-Resistant
  </Name>
  <Diagnosis>
    <Tool>
      <Name>
        Null
      </Name>
      <Value>
        "Not responded adequately to
antipsychotic medication irrespective of diagnosis"
      </Value>
      <User>
        Null
      </User>
    </Tool>
    <History>
      Null
    </History>
  </Diagnosis>
</Problem>
<Problem>
  <Name>
    Auditory Hallucinations
  </Name>
  <Diagnosis>
    <Tool>
      <Name>
        Null
      </Name>
      <Value>
        Greater than or equal to 6 months
      </Value>
      <User>
        Null
      </User>
    </Tool>
    <History>
      Null
    </History>
  </Diagnosis>
</Problem>
<Age>
  <Identifying>
    ID Card
  </Identifying>
  <Min>
    14
  </Min>
  <Max>
```

```

    75
  </Max>
  <Mean>
    Null
  </Mean>
  <SD>
    Null
  </SD>
  <Median>
    Null
  </Median>
  <Mode>
    Null
  </Mode>
</Age>
<Gender>
  <Type>
    Male
  </Type>
  <Number>
    Null
  </Number>
  <Type>
    Female
  </Type>
  <Number>
    Null
  </Number>
  <Identifier>
    Null
  </Identifier>
</Gender>
</Inclusion_Criteria>
<Exclusion_Criteria>
  <Problem>
    <Name>
      Organic Brain Disease
    </Name>
    <Diagnosis>
      <Tool>
        <Name>
          Null
        </Name>
        <Value>
          Null
        </Value>
        <User>
          Null
        </User>
      </Tool>
    <History>
      Null
    </History>
  </Problem>
</Exclusion_Criteria>
</Inclusion_Criteria>

```

```

        </Diagnosis>
    </Problem>
    <Problem>
        <Name>
            Substance Misuse
        </Name>
        <Diagnosis>
            <Tool>
                <Name>
                    Null
                </Name>
                <Value>
                    Null
                </Value>
                <User>
                    Null
                </User>
            </Tool>
            <History>
                Null
            </History>
        </Diagnosis>
    </Problem>
</Exclusion_Criteria>
<Char_Type>
    Adults
</Char_Type>
<Char_Size>
    26
</Char_Size>
<Char_Ethnicity>
    Null
</Char_Ethnicity>
</Participants>
<Interventions>
    <Group_A>
        <Category>
            <Cat_ID>
                0000100
            </Cat_ID>
            <Cat_Name>
                Non-Pharmaceuticals
            </Cat_Name>
        </Category>
        <Int_ID>
            0000110
        </Int_ID>
        <Int_Name>
            Avatar Therapy
        </Int_Name>
        <Int_Route>
            <Route_ID>
                0000111
            </Route_ID>
        </Int_Route>
    </Group_A>
</Interventions>

```

```
        </Route_ID>
        <Route_Name>
            Mental
        </Route_Name>
    </Int_Route>
    <Char_Dose Type="Session">
        6
    </Char_Dose>
    <Char_Time Type="Frequency">
        Weekly
    </Char_Time>
    <Char_Time Type="Duration">
        30 Min
    </Char_Time>
    <Char_Number>
        14
    </Char_Number>
</Group_A>
<Group_B>
    <Category>
        <Cat_ID>
            000020000
        </Cat_ID>
        <Cat_Name>
            Controls
        </Cat_Name>
    </Category>
    <Int_ID>
        00001200
    </Int_ID>
    <Int_Name>
        Waitlist
    </Int_Name>
    <Int_Route>
        <Route_ID>
            0000000
        </Route_ID>
        <Route_Name>
            Null
        </Route_Name>
    </Int_Route>
    <Char_Dose Type="Session">
        Null
    </Char_Dose>
    <Char_Time Type="Frequency">
        Null
    </Char_Time>
    <Char_Time Type="Duration">
        Null
    </Char_Time>
    <Char_Number>
        12
    </Char_Number>
```

```
</Group_B>
</Interventions>
<Outcomes>
  <Outcome_1>
    <Category>
      <Cat_ID>
        0000100
      </Cat_ID>
      <Cat_Name>
        Psychotic Symptoms
      </Cat_Name>
    </Category>
    <Term>
      Short-Term
    </Term>
    <Scale>
      <ID>
        0000100
      </ID>
      <Name>
        Psychotic Symptoms Rating Scale
      </Name>
      <Citation_Status>
        Cited
      </Citation_Status>
    </Scale>
    <Data>
      <Data_Type>
        Continuous
      </Data_Type>
      <Data_Range>
        [Needs Checking]
      </Data_Range>
      <Data_A>
        <Type_Pre>
          <Mean>
            29.25
          </Mean>
          <SD>
            04.86
          </SD>
        </Type_Pre>
        <Type_Post>
          <Mean>
            23.63
          </Mean>
          <SD>
            08.03
          </SD>
        </Type_Post>
      </Data_A>
      <Data_B>
        <Type_Pre>
```



```
                <SD>
                    07.58
                </SD>
            </Type_Pre>
            <Type_Post>
                <Mean>
                    18.88
                </Mean>
                <SD>
                    07.24
                </SD>
            </Type_Post>
        </Data_A>
        <Data_B>
            <Type_Pre>
                <Mean>
                    21.38
                </Mean>
                <SD>
                    08.85
                </SD>
            </Type_Pre>
            <Type_Post>
                <Mean>
                    21.00
                </Mean>
                <SD>
                    11.33
                </SD>
            </Type_Post>
        </Data_B>
    </Data>
</Outcome_2>
<Outcome_3>
    <Category>
        <Cat_ID>
            0000300
        </Cat_ID>
        <Cat_Name>
            Depression
        </Cat_Name>
    </Category>
    <Term>
        Short-Term
    </Term>
    <Scale>
        <ID>
            0000300
        </ID>
        <Name>
            Calgary Depression Scale
        </Name>
        <Citation_Status>
```



```
        Cited
      </Citation_Status>
    </Scale>
    <Data>
      <Data_Type>
        Continuous
      </Data_Type>
      <Data_Range>
        [Needs Checking]
      </Data_Range>
      <Data_A>
        <Type_Pre>
          <Mean>
            06.88
          </Mean>
          <SD>
            04.02
          </SD>
        </Type_Pre>
        <Type_Post>
          <Mean>
            08.50
          </Mean>
          <SD>
            05.29
          </SD>
        </Type_Post>
      </Data_A>
      <Data_B>
        <Type_Pre>
          <Mean>
            09.25
          </Mean>
          <SD>
            02.37
          </SD>
        </Type_Pre>
        <Type_Post>
          <Mean>
            08.63
          </Mean>
          <SD>
            08.49
          </SD>
        </Type_Post>
      </Data_B>
    </Data>
  </Outcome_3>
  <Outcome_4>
    <Category>
      <Cat_ID>
        0000001
      </Cat_ID>
```

```

        <Cat_Name>
            Drop Out
        </Cat_Name>
    </Category>
    <Term>
        Short-Term
    </Term>
    <Scale>
        <ID>
            0000001
        </ID>
        <Name>
            Number of Patients
        </Name>
        <Citation_Status>
            Null
        </Citation_Status>
    </Scale>
    <Data>
        <Data_Type>
            Binary
        </Data_Type>
        <Data_Range>
            Null
        </Data_Range>
        <Data_A>
            <Reason_1>
                <Name>
                    Mixed [Needs Contacting the
                </Name>
                <Number>
                    5
                </Number>
            </Reason_1>
            <Reason_2>
                <Name>
                    Change in Medication
                </Name>
                <Number>
                    1
                </Number>
            </Reason_2>
        </Data_A>
        <Data_B>
            <Reason_1>
                <Name>
                    Null
                </Name>
                <Number>
                    0
                </Number>
            </Reason_1>

```

Authors]

```

        </Data_B>
    </Data>
</Outcome_4>
</Outcomes>
</PICO>
<Rist_of_Bias>
    <Rist_of_Bias_Allocation>
        <Type>
            <Value>
                Randomized
            </Value>
            <Quotation>
                "Patients were randomly assigned to"
            </Quotation>
            <Location>
                18559PG4CL2P2L1W4-8
            </Location>
        </Type>
    </Method>
        <Type>
            Computer-Generated
        </Type>
        <Quotation>
            "Computer-generated series with blocks of 12"
        </Quotation>
        <Location>
            18559PG3CL2P6L2W5-11
        </Location>
    </Method>
    <By>
        <Type>
            Statistician
        </Type>
        <Quotation>
            "An Independent Statistician"
        </Quotation>
        <Location>
            18559PG3CL2P6L3W3-5
        </Location>
        <Testing>
            <Type>
                T-Test
            </Type>
            <Quotation>
                "Independent-sample t-tests to look for any failure
of randomisation"
            </Quotation>
            <Location>
                18559PG4C1P5L1-2W3-12
            </Location>
            <Verification>
                [Needs Checking]
            </Verification>

```

</Testing>  
</By>  
</Rist\_of\_Bias\_Allocation>  
<Rist\_of\_Bias\_Blinding>  
<Type>  
Single  
</Type>  
<Who>  
[Needs Contacting the Authors]  
</Who>  
<Quotation>  
"Single blind"  
</Quotation>  
<Location>  
18559ABML1W8-9  
</Location>  
</Rist\_of\_Bias\_Blinding>  
<Risk\_of\_Bias\_Concealment>  
<Method>  
Null  
</Method>  
<Quotation>  
Null  
</Quotation>  
<Location>  
Null  
</Location>  
</Risk\_of\_Bias\_Concealment>  
<Risk\_of\_Bias\_Incomplete\_Data>  
Null  
</Risk\_of\_Bias\_Incomplete\_Data>  
<Risk\_of\_Bias\_Selective\_Reporting>  
Null  
</Risk\_of\_Bias\_Selective\_Reporting>  
<Risk\_of\_Bias\_Other\_1>  
Null  
</Risk\_of\_Bias\_Other\_1>  
<Risk\_of\_Bias\_Other\_2>  
Null  
</Risk\_of\_Bias\_Other\_2>  
</Rist\_of\_Bias>  
<Notes>  
<Funding>  
<Type>  
Non-Pharma  
</Type>  
<Name\_1>  
National Institute of Health Research  
</Name\_1>  
<Name\_2>  
Bridging Funding from Camden and Islington NHS Foundation Trust  
</Name\_2>  
<Number>

```
RC-PG-0308-10232
</Number>
<Acknokledge>
  <Status>
    Acknowledged
  </Status>
  <Location>
    18559Funding
  </Location>
</Acknokledge>
</Funding>
<Protocol>
  Null
</Protocol>
<Note>
  Null
</Note>
<Conflict_of_Intersts>
  Null
</Conflict_of_Intersts>
<Ethics>
  <Informed_Consent>
    Yes
  </Informed_Consent>
  <Ethics_Committee>
    Yes
  </Ethics_Committee>
</Ethics>
</Notes>
<References>
  <Reference>
    <ref-type name="Journal Article">
      17
    </ref-type>
    <contributors>
      <authors>
        <author>
          Leff, J.
        </author>
        <author>
          Williams, G.
        </author>
        <author>
          Huckvale, M.
        </author>
        <author>
          Arbuthnot, M.
        </author>
        <author>
          Leff, A. P.
        </author>
      </authors>
    </contributors>
  </Reference>
</References>
```

is it and how does it work?

```
<titles>
  <title>
    Avatar therapy for persecutory auditory hallucinations: What
  </title>
  <secondary-title>
    Psychosis
  </secondary-title>
  <Trial_Registry_Number>
    Null
  </Trial_Registry_Number>
</titles>
<pages>
  166-176
</pages>
<volume>
  6
</volume>
<number>
  2
</number>
  <dates>
    <year>
      2014
    </year>
  </dates>
<issn>
  1752-2439 (Print) 1752-2447 (Electronic)
</issn>
<accession-num>
  PubMed: 24999369
</accession-num>
<abstract>
  [Copyrighted Materials]
</abstract>
<Report_Number>
  19867
</Report_Number>
<electronic-resource-num>
  10.1080/17522439.2013.773457
</electronic-resource-num>
<language>
  English
</language>
</Reference>
<Reference>
  <ref-type name="Journal Article">
    17
  </ref-type>
  <contributors>
    <authors>
      <author>
        Craig, T.
      </author>
    </authors>
  </contributors>
</Reference>
```

avatar clinical trial

```
</author>
<author>
    Garety, P.
</author>
<author>
    Ward, T.
</author>
<author>
    Rus-Calafell, M.
</author>
<author>
    Williams, G.
</author>
<author>
    Huckvale, M.
</author>
<author>
    Leff, J.
</author>
</authors>
</contributors>
<titles>
    <title>
        Computer assisted therapy for auditory hallucinations: The
    </title>
    <secondary-title>
        Schizophrenia Research
    </secondary-title>
    <Trial_Registry_Number>
        Null
    </Trial_Registry_Number>
</titles>
<pages>
    S74
</pages>
<volume>
    153
</volume>
<number>
    Supplement 1
</number>
<dates>
    <year>
        2014
    </year>
</dates>
<issn>
    0920-9964 (Print) 1573-2509 (Electronic)
</issn>
<accession-num>
    Null
</accession-num>
```

```
<abstract>
  [Copyrighted Materials]
</abstract>
<Report_Number>
  21500
</Report_Number>
<electronic-resource-num>
  10.1016/S0920-9964(14)70240-3
</electronic-resource-num>
<language>
  English
</language>
</Reference>
<Reference>
  <ref-type name="Journal Article">
    17
  </ref-type>
  <contributors>
    <authors>
      <author>
        Leff, J.
      </author>
      <author>
        Williams, G.
      </author>
      <author>
        Huckvale, M. A.
      </author>
      <author>
        Arbuthnot, M.
      </author>
      <author>
        Leff, A. P.
      </author>
    </authors>
  </contributors>
  <titles>
    <title>
      Computer-assisted therapy for medication-resistant auditory
      hallucinations: proof-of-concept study
    </title>
    <secondary-title>
      British Journal of Psychiatry
    </secondary-title>
    <Trial_Registry_Number>
      Null
    </Trial_Registry_Number>
  </titles>
  <pages>
    428-433
  </pages>
  <volume>
    202
```



```
</volume>
<number>
  6
</number>
<dates>
  <year>
    2013
  </year>
</dates>
<issn>
  0007-1250 (Print) 1472-1465 (Electronic)
</issn>
<accession-num>
  PubMed: 23429202
</accession-num>
<abstract>
  [Copyrighted Materials]
</abstract>
<Report_Number>
  18559
</Report_Number>
<electronic-resource-num>
  10.1192/bjp.bp.112.124883
</electronic-resource-num>
<language>
  English
</language>
</Reference>
<Reference>
  <ref-type name="Journal Article">
    17
  </ref-type>
  <contributors>
    <authors>
      <author>
        Null
      </author>
    </authors>
  </contributors>
  <titles>
    <title>
      Corrections
    </title>
    <secondary-title>
      British Journal of Psychiatry
    </secondary-title>
    <Trial_Registry_Number>
      Null
    </Trial_Registry_Number>
  </titles>
  <pages>
    313-313
  </pages>
```

```
<volume>
    203
</volume>
<number>
    4
</number>
<dates>
    <year>
        2013
    </year>
</dates>
<issn>
    0007-1250 (Print) 1472-1465 (Electronic)
</issn>
<accession-num>
    Null
</accession-num>
<abstract>
    [Copyrighted Materials]
</abstract>
<Report_Number>
    21977
</Report_Number>
<electronic-resource-num>
    10.1192/bjp.203.4.313
</electronic-resource-num>
<language>
    English
</language>
</Reference>
<Reference>
    <ref-type name="Journal Article">
        17
    </ref-type>
    <contributors>
        <authors>
            <author>
                Ward, T.
            </author>
            <author>
                Jamieson-Craig, T.
            </author>
            <author>
                Garety, P. A.
            </author>
            <author>
                Rus-Calafell, M.
            </author>
            <author>
                McCrone, P.
            </author>
            <author>
                Emsley, R.
            </author>
        </authors>
    </contributors>
</Reference>
```

```

        </author>
        <author>
            Williams, G.
        </author>
        <author>
            Huckvale, M.
        </author>
        <author>
            Leff, J.
        </author>
    </authors>
</contributors>
<titles>
    <title>
        A randomized clinical trial of a novel audio-visual assisted
        therapy aid for refractory auditory hallucinations (AVATAR therapy)
    </title>
    <secondary-title>
        Early Intervention in Psychiatry
    </secondary-title>
    <Trial_Registry_Number>
        Null
    </Trial_Registry_Number>
</titles>
<pages>
    42
</pages>
<volume>
    8
</volume>
<number>
    S1
</number>
<dates>
    <year>
        2014
    </year>
</dates>
<issn>
    1751-7885 (Print) 1751-7893 (Electronic)
</issn>
<accession-num>
    Null
</accession-num>
<abstract>
    [Copyrighted Materials]
</abstract>
<Report_Number>
    21666
</Report_Number>
<electronic-resource-num>
    Null
</electronic-resource-num>

```

```
</Studies>
  </Study>
    </References>
      </Reference>
        </language>
          English
        </language>
      </Reference>
    </References>
  </Study>
</Studies>
```
